# Supplementary material for: The Halophyte Dehydrin Sequence Landscape
Source: MDPI journal article supplement (doi:10.3390/biom12020330), 2022-02-19
Supplement: s1 [file s1]

## Supplementary Tables

**Table S1. Amino acid frequencies of the halophytic K-segment.**

|                  | Amino Acid |      |      |      |      |      |      |      |      |      |      |      |      |      |      |      |      |      |      |      |
|------------------|------------|------|------|------|------|------|------|------|------|------|------|------|------|------|------|------|------|------|------|------|
|                  | A          | C    | D    | E    | F    | G    | H    | I    | K    | L    | M    | N    | P    | Q    | R    | S    | T    | V    | W    | Y    |
| Residue Position | 1          | 0.02 | 0.00 | 0.03 | 0.64 | 0.00 | 0.00 | 0.01 | 0.00 | 0.19 | 0.00 | 0.00 | 0.00 | 0.00 | 0.10 | 0.00 | 0.00 | 0.00 | 0.00 | 0.00 |
|                  | 2          | 0.00 | 0.00 | 0.00 | 0.05 | 0.00 | 0.02 | 0.00 | 0.00 | 0.84 | 0.00 | 0.00 | 0.01 | 0.00 | 0.00 | 0.05 | 0.00 | 0.00 | 0.00 | 0.00 |
|                  | 3          | 0.00 | 0.00 | 0.00 | 0.07 | 0.00 | 0.04 | 0.00 | 0.00 | 0.88 | 0.00 | 0.00 | 0.00 | 0.00 | 0.00 | 0.00 | 0.00 | 0.00 | 0.00 | 0.00 |
|                  | 4          | 0.00 | 0.00 | 0.00 | 0.00 | 0.00 | 0.85 | 0.00 | 0.00 | 0.00 | 0.00 | 0.00 | 0.00 | 0.00 | 0.00 | 0.11 | 0.02 | 0.00 | 0.00 | 0.00 |
|                  | 5          | 0.00 | 0.00 | 0.00 | 0.00 | 0.20 | 0.00 | 0.00 | 0.22 | 0.00 | 0.25 | 0.12 | 0.00 | 0.00 | 0.00 | 0.00 | 0.00 | 0.20 | 0.00 | 0.00 |
|                  | 6          | 0.00 | 0.00 | 0.00 | 0.00 | 0.03 | 0.00 | 0.00 | 0.08 | 0.15 | 0.15 | 0.46 | 0.00 | 0.00 | 0.00 | 0.00 | 0.03 | 0.08 | 0.00 | 0.00 |
|                  | 7          | 0.00 | 0.00 | 0.22 | 0.69 | 0.00 | 0.05 | 0.00 | 0.00 | 0.01 | 0.00 | 0.00 | 0.00 | 0.01 | 0.00 | 0.00 | 0.00 | 0.00 | 0.00 | 0.00 |
|                  | 8          | 0.00 | 0.00 | 0.00 | 0.00 | 0.00 | 0.00 | 0.00 | 0.89 | 0.00 | 0.01 | 0.04 | 0.00 | 0.03 | 0.00 | 0.00 | 0.00 | 0.00 | 0.00 | 0.00 |
|                  | 9          | 0.00 | 0.00 | 0.00 | 0.00 | 0.00 | 0.00 | 0.92 | 0.00 | 0.04 | 0.01 | 0.00 | 0.00 | 0.00 | 0.00 | 0.00 | 0.00 | 0.03 | 0.00 | 0.00 |
|                  | 10         | 0.00 | 0.00 | 0.00 | 0.01 | 0.00 | 0.00 | 0.00 | 0.87 | 0.00 | 0.05 | 0.00 | 0.00 | 0.00 | 0.00 | 0.03 | 0.01 | 0.00 | 0.00 | 0.00 |
|                  | 11         | 0.00 | 0.00 | 0.20 | 0.77 | 0.00 | 0.01 | 0.00 | 0.00 | 0.00 | 0.00 | 0.00 | 0.00 | 0.00 | 0.00 | 0.00 | 0.00 | 0.00 | 0.00 | 0.00 |
|                  | 12         | 0.00 | 0.00 | 0.00 | 0.00 | 0.00 | 0.00 | 0.02 | 0.00 | 0.94 | 0.00 | 0.01 | 0.00 | 0.00 | 0.00 | 0.00 | 0.00 | 0.00 | 0.00 | 0.00 |
|                  | 13         | 0.00 | 0.00 | 0.00 | 0.00 | 0.09 | 0.00 | 0.00 | 0.17 | 0.00 | 0.70 | 0.02 | 0.00 | 0.00 | 0.00 | 0.00 | 0.00 | 0.01 | 0.00 | 0.00 |
|                  | 14         | 0.00 | 0.00 | 0.00 | 0.00 | 0.00 | 0.02 | 0.14 | 0.00 | 0.02 | 0.00 | 0.00 | 0.74 | 0.00 | 0.00 | 0.04 | 0.01 | 0.00 | 0.00 | 0.00 |
|                  | 15         | 0.01 | 0.00 | 0.02 | 0.00 | 0.00 | 0.82 | 0.05 | 0.00 | 0.01 | 0.00 | 0.00 | 0.00 | 0.00 | 0.03 | 0.02 | 0.00 | 0.00 | 0.00 | 0.00 |

**Table S2. Amino acid frequencies of the halophytic F-segment.**

|                  | Amino Acid |      |      |      |      |      |      |      |      |      |      |      |      |      |      |      |      |      |      |      |
|------------------|------------|------|------|------|------|------|------|------|------|------|------|------|------|------|------|------|------|------|------|------|
|                  | A          | C    | D    | E    | F    | G    | H    | I    | K    | L    | M    | N    | P    | Q    | R    | S    | T    | V    | W    | Y    |
| Residue Position | 1          | 0.04 | 0.00 | 0.00 | 0.91 | 0.00 | 0.00 | 0.00 | 0.00 | 0.00 | 0.00 | 0.04 | 0.00 | 0.00 | 0.00 | 0.00 | 0.00 | 0.00 | 0.00 | 0.00 |
|                  | 2          | 0.04 | 0.00 | 0.00 | 0.00 | 0.00 | 0.00 | 0.00 | 0.00 | 0.09 | 0.00 | 0.00 | 0.00 | 0.00 | 0.04 | 0.00 | 0.09 | 0.17 | 0.57 | 0.00 |
|                  | 3          | 0.00 | 0.00 | 0.00 | 0.04 | 0.00 | 0.00 | 0.00 | 0.00 | 0.43 | 0.00 | 0.00 | 0.00 | 0.00 | 0.04 | 0.22 | 0.26 | 0.00 | 0.00 | 0.00 |
|                  | 4          | 0.00 | 0.00 | 0.87 | 0.00 | 0.00 | 0.09 | 0.00 | 0.00 | 0.00 | 0.00 | 0.00 | 0.00 | 0.00 | 0.00 | 0.04 | 0.00 | 0.00 | 0.00 | 0.00 |
|                  | 5          | 0.00 | 0.09 | 0.00 | 0.00 | 0.00 | 0.00 | 0.04 | 0.00 | 0.00 | 0.00 | 0.00 | 0.00 | 0.00 | 0.87 | 0.00 | 0.00 | 0.00 | 0.00 | 0.00 |
|                  | 6          | 0.00 | 0.00 | 0.00 | 0.00 | 0.00 | 1.00 | 0.00 | 0.00 | 0.00 | 0.00 | 0.00 | 0.00 | 0.00 | 0.00 | 0.00 | 0.00 | 0.00 | 0.00 | 0.00 |
|                  | 7          | 0.00 | 0.00 | 0.00 | 0.00 | 0.00 | 0.00 | 0.00 | 0.00 | 0.65 | 0.26 | 0.00 | 0.00 | 0.04 | 0.00 | 0.00 | 0.00 | 0.04 | 0.00 | 0.00 |
|                  | 8          | 0.00 | 0.00 | 0.00 | 0.00 | 0.87 | 0.00 | 0.00 | 0.00 | 0.09 | 0.00 | 0.00 | 0.00 | 0.00 | 0.00 | 0.00 | 0.00 | 0.04 | 0.00 | 0.00 |
|                  | 9          | 0.00 | 0.00 | 0.91 | 0.00 | 0.00 | 0.04 | 0.00 | 0.00 | 0.00 | 0.00 | 0.00 | 0.00 | 0.00 | 0.00 | 0.00 | 0.00 | 0.00 | 0.00 | 0.04 |
|                  | 10         | 0.00 | 0.09 | 0.00 | 0.00 | 0.74 | 0.00 | 0.09 | 0.00 | 0.00 | 0.04 | 0.04 | 0.00 | 0.00 | 0.00 | 0.00 | 0.00 | 0.00 | 0.00 | 0.00 |
|                  | 11         | 0.00 | 0.00 | 0.00 | 0.26 | 0.00 | 0.00 | 0.00 | 0.00 | 0.39 | 0.35 | 0.00 | 0.00 | 0.00 | 0.00 | 0.00 | 0.00 | 0.00 | 0.00 | 0.00 |
|                  | 12         | 0.00 | 0.00 | 0.00 | 0.00 | 0.57 | 0.00 | 0.00 | 0.35 | 0.04 | 0.00 | 0.00 | 0.00 | 0.04 | 0.00 | 0.00 | 0.00 | 0.00 | 0.00 | 0.00 |
|                  | 13         | 0.00 | 0.00 | 0.00 | 0.00 | 0.00 | 0.04 | 0.00 | 0.00 | 0.78 | 0.00 | 0.00 | 0.04 | 0.00 | 0.00 | 0.04 | 0.00 | 0.09 | 0.00 | 0.00 |
|                  | 14         | 0.00 | 0.00 | 0.04 | 0.09 | 0.00 | 0.00 | 0.00 | 0.00 | 0.83 | 0.00 | 0.00 | 0.04 | 0.00 | 0.00 | 0.00 | 0.00 | 0.00 | 0.00 | 0.00 |

**Table S3. Amino acid frequencies of the halophytic Y-segment.**

|                  | Amino Acid |      |      |      |      |      |      |      |      |      |      |      |      |      |      |      |      |      |      |      |
|------------------|------------|------|------|------|------|------|------|------|------|------|------|------|------|------|------|------|------|------|------|------|
|                  | A          | C    | D    | E    | F    | G    | H    | I    | K    | L    | M    | N    | P    | Q    | R    | S    | T    | V    | W    | Y    |
| Residue Position | 1          | 0.00 | 0.00 | 0.90 | 0.08 | 0.00 | 0.00 | 0.00 | 0.00 | 0.00 | 0.00 | 0.02 | 0.00 | 0.00 | 0.00 | 0.00 | 0.00 | 0.00 | 0.00 | 0.00 |
|                  | 2          | 0.06 | 0.00 | 0.02 | 0.80 | 0.00 | 0.00 | 0.00 | 0.02 | 0.00 | 0.00 | 0.00 | 0.00 | 0.10 | 0.00 | 0.00 | 0.00 | 0.00 | 0.00 | 0.00 |
|                  | 3          | 0.02 | 0.00 | 0.00 | 0.00 | 0.08 | 0.00 | 0.08 | 0.00 | 0.02 | 0.04 | 0.00 | 0.00 | 0.00 | 0.04 | 0.00 | 0.00 | 0.00 | 0.00 | 0.71 |
|                  | 4          | 0.00 | 0.00 | 0.00 | 0.00 | 0.98 | 0.00 | 0.00 | 0.00 | 0.00 | 0.00 | 0.00 | 0.00 | 0.02 | 0.00 | 0.00 | 0.00 | 0.00 | 0.00 | 0.00 |
|                  | 5          | 0.00 | 0.00 | 0.02 | 0.00 | 0.00 | 0.00 | 0.00 | 0.04 | 0.00 | 0.00 | 0.76 | 0.00 | 0.08 | 0.00 | 0.00 | 0.00 | 0.02 | 0.00 | 0.00 |
|                  | 6          | 0.02 | 0.00 | 0.00 | 0.00 | 0.00 | 0.00 | 0.02 | 0.00 | 0.00 | 0.00 | 0.00 | 0.94 | 0.00 | 0.02 | 0.00 | 0.00 | 0.00 | 0.00 | 0.00 |
|                  | 7          | 0.00 | 0.00 | 0.00 | 0.00 | 0.02 | 0.00 | 0.00 | 0.24 | 0.00 | 0.08 | 0.06 | 0.00 | 0.00 | 0.00 | 0.00 | 0.02 | 0.57 | 0.00 | 0.00 |

**Table S4. Amino acid frequencies of the halophytic S-segment.**

|                  | Amino Acid |      |      |      |      |      |      |      |      |      |      |      |      |      |      |      |      |      |      |      |
|------------------|------------|------|------|------|------|------|------|------|------|------|------|------|------|------|------|------|------|------|------|------|
|                  | A          | C    | D    | E    | F    | G    | H    | I    | K    | L    | M    | N    | P    | Q    | R    | S    | T    | V    | W    | Y    |
| Residue Position | 1          | 0.08 | 0.12 | 0.00 | 0.02 | 0.03 | 0.06 | 0.03 | 0.07 | 0.01 | 0.53 | 0.00 | 0.00 | 0.00 | 0.00 | 0.03 | 0.00 | 0.01 | 0.00 | 0.00 |
|                  | 2          | 0.00 | 0.00 | 0.11 | 0.00 | 0.00 | 0.08 | 0.54 | 0.00 | 0.03 | 0.01 | 0.00 | 0.01 | 0.01 | 0.04 | 0.08 | 0.07 | 0.00 | 0.00 | 0.01 |
|                  | 3          | 0.02 | 0.01 | 0.01 | 0.01 | 0.00 | 0.09 | 0.06 | 0.01 | 0.02 | 0.02 | 0.00 | 0.04 | 0.01 | 0.00 | 0.52 | 0.17 | 0.00 | 0.00 | 0.00 |
|                  | 4          | 0.01 | 0.01 | 0.04 | 0.00 | 0.00 | 0.01 | 0.06 | 0.00 | 0.00 | 0.00 | 0.00 | 0.02 | 0.01 | 0.00 | 0.00 | 0.82 | 0.01 | 0.00 | 0.00 |
|                  | 5          | 0.11 | 0.00 | 0.17 | 0.01 | 0.00 | 0.30 | 0.06 | 0.00 | 0.01 | 0.01 | 0.00 | 0.09 | 0.02 | 0.00 | 0.01 | 0.20 | 0.00 | 0.00 | 0.00 |
|                  | 6          | 0.01 | 0.00 | 0.07 | 0.00 | 0.00 | 0.01 | 0.00 | 0.00 | 0.01 | 0.00 | 0.00 | 0.00 | 0.00 | 0.00 | 0.90 | 0.00 | 0.00 | 0.00 | 0.00 |
|                  | 7          | 0.07 | 0.01 | 0.08 | 0.00 | 0.00 | 0.06 | 0.00 | 0.00 | 0.00 | 0.00 | 0.00 | 0.02 | 0.00 | 0.00 | 0.00 | 0.74 | 0.02 | 0.00 | 0.00 |
|                  | 8          | 0.00 | 0.01 | 0.00 | 0.00 | 0.00 | 0.04 | 0.00 | 0.01 | 0.00 | 0.00 | 0.00 | 0.04 | 0.00 | 0.00 | 0.00 | 0.88 | 0.01 | 0.00 | 0.00 |
|                  | 9          | 0.08 | 0.00 | 0.08 | 0.00 | 0.00 | 0.02 | 0.00 | 0.00 | 0.02 | 0.00 | 0.00 | 0.03 | 0.00 | 0.00 | 0.00 | 0.76 | 0.00 | 0.00 | 0.00 |
|                  | 10         | 0.00 | 0.00 | 0.03 | 0.01 | 0.00 | 0.03 | 0.00 | 0.00 | 0.00 | 0.00 | 0.00 | 0.00 | 0.01 | 0.00 | 0.00 | 0.91 | 0.00 | 0.00 | 0.00 |
|                  | 11         | 0.09 | 0.00 | 0.09 | 0.02 | 0.00 | 0.11 | 0.00 | 0.01 | 0.00 | 0.00 | 0.00 | 0.00 | 0.00 | 0.00 | 0.00 | 0.65 | 0.02 | 0.00 | 0.00 |
|                  | 12         | 0.00 | 0.01 | 0.10 | 0.06 | 0.00 | 0.02 | 0.00 | 0.00 | 0.01 | 0.00 | 0.00 | 0.00 | 0.00 | 0.00 | 0.00 | 0.79 | 0.00 | 0.01 | 0.00 |
|                  | 13         | 0.00 | 0.00 | 0.36 | 0.42 | 0.00 | 0.03 | 0.01 | 0.00 | 0.01 | 0.00 | 0.00 | 0.00 | 0.02 | 0.00 | 0.01 | 0.12 | 0.00 | 0.01 | 0.00 |
|                  | 14         | 0.00 | 0.00 | 0.58 | 0.19 | 0.00 | 0.02 | 0.00 | 0.00 | 0.04 | 0.01 | 0.00 | 0.01 | 0.00 | 0.00 | 0.00 | 0.11 | 0.00 | 0.02 | 0.00 |
|                  | 15         | 0.00 | 0.02 | 0.57 | 0.26 | 0.00 | 0.06 | 0.01 | 0.00 | 0.02 | 0.01 | 0.00 | 0.00 | 0.01 | 0.00 | 0.03 | 0.00 | 0.00 | 0.00 | 0.00 |
